# Supplementary material for: Tenacibaculosis in Norwegian Atlantic salmon (Salmo salar) cage‐farmed in cold sea water is primarily associated with Tenacibaculum finnmarkense genomovar finnmarkense
Source: PubMed Central journal article supplement — J Fish Dis. 2022 Jan 9;45(4):523–34. doi: 10.1111/jfd.13577 (PMC9303539; doi:10.1111/jfd.13577), 2022-01-09
Supplement: JFD-45-523-s001.pdf [file JFD-45-523-s001.pdf]

Supplementary table 1. Results of bacterial culture. Number of fish per farm with *Tenacibaculum* spp., *Moritella viscosa* and *Aliivibrio wodanis* isolated from head ulcers, flank ulcers and kidney and from normal skin of control fish in the same farm. Growth of *Tenacibaculum* spp. is shown as sparse (S), moderate (M) and rich (R). n.d.= not done, - = not relevant

| Farm ID            | Fish with skin lesions | Head ulcer                |      |   |    |    |                          | Flank ulcer               |                           |      |   |   |    | Kidney                   |                           |                           |      |   |   | Control fish |                          |                           |       |      |      |      |      |   |    |   |
|--------------------|------------------------|---------------------------|------|---|----|----|--------------------------|---------------------------|---------------------------|------|---|---|----|--------------------------|---------------------------|---------------------------|------|---|---|--------------|--------------------------|---------------------------|-------|------|------|------|------|---|----|---|
|                    |                        | <i>Tenacibaculum</i> spp. |      | S | M  | R  | <i>Moritella viscosa</i> | <i>Aliivibrio wodanis</i> | <i>Tenacibaculum</i> spp. |      | S | M | R  | <i>Moritella viscosa</i> | <i>Aliivibrio wodanis</i> | <i>Tenacibaculum</i> spp. |      | S | M | R            | <i>Moritella viscosa</i> | <i>Aliivibrio wodanis</i> |       |      |      |      |      |   |    |   |
|                    |                        | Total                     | spp. |   |    |    |                          |                           | Total                     | spp. |   |   |    |                          |                           | Total                     | spp. |   |   |              |                          |                           | Total | spp. |      |      |      |   |    |   |
| Farm 01            | 7                      | 2                         | 1    | 0 | 1  | 0  | 0                        | 0                         | 7                         | 7    | 2 | 3 | 2  | 0                        | 1                         | 7                         | 3    | 1 | 2 | 0            | 0                        | 0                         | 0     | 0    | -    | -    | -    | - | -  | - |
| Farm 02            | 5                      | 5                         | 5    | 0 | 0  | 5  | 0                        | 1                         | 1                         | 1    | 0 | 0 | 1  | 0                        | 1                         | 5                         | 0    | - | - | -            | 0                        | 2                         | 5     | 0    | -    | -    | -    | 0 | 5  |   |
| Farm 03            | 5                      | 5                         | 5    | 2 | 3  | 0  | 0                        | 0                         | 0                         | -    | - | - | -  | -                        | 5                         | 0                         | -    | - | - | 3            | 0                        | 5                         | 0     | -    | -    | -    | 3    | 3 |    |   |
| Farm 04            | 4                      | 4                         | 3    | 3 | 0  | 0  | 0                        | 5                         | 0                         | -    | - | - | -  | -                        | 4                         | 0                         | -    | - | - | 0            | 1                        | 0                         | -     | -    | -    | -    | -    | - |    |   |
| Farm 05            | 5                      | 3                         | 3    | 0 | 1  | 2  | 0                        | 0                         | 2                         | 2    | 0 | 0 | 2  | 0                        | 0                         | 5                         | 0    | - | - | -            | 0                        | 0                         | 0     | -    | -    | -    | -    | - |    |   |
| Farm 06            | 5                      | 5                         | 5    | 0 | 0  | 5  | 0                        | 0                         | 4                         | 4    | 0 | 1 | 3  | 0                        | 1                         | 5                         | 0    | - | - | -            | 0                        | 0                         | 0     | -    | -    | -    | -    | - |    |   |
| Farm 07            | 5                      | 5                         | 5    | 1 | 2  | 2  | 0                        | 1                         | 0                         | -    | - | - | -  | -                        | 5                         | 0                         | -    | - | - | 0            | 0                        | 0                         | -     | -    | -    | -    | -    | - |    |   |
| Farm 08            | 7                      | 7                         | 5    | 1 | 3  | 1  | 3                        | 2                         | 5                         | 3    | 0 | 1 | 2  | 4                        | 0                         | 7                         | 0    | - | - | -            | 0                        | 0                         | 3     | 0    | -    | -    | -    | 2 | 0  |   |
| Farm 09            | 5                      | 5                         | 4    | 0 | 0  | 4  | 3                        | 3                         | 5                         | 0    | - | - | -  | 4                        | 2                         | 5                         | 0    | - | - | -            | 3                        | 2                         | 10    | 6    | 6    | 0    | 0    | 4 | 6  |   |
| Farm 10            | 5                      | 5                         | 5    | 1 | 3  | 1  | 0                        | 2                         | 0                         | -    | - | - | -  | -                        | 5                         | 0                         | -    | - | - | 0            | 1                        | 0                         | -     | -    | -    | -    | -    | - |    |   |
| Farm 11            | 5                      | 5                         | 3    | 0 | 2  | 1  | 0                        | 0                         | 0                         | -    | - | - | -  | -                        | 5                         | 0                         | -    | - | - | 0            | 0                        | 5                         | 3     | 3    | 0    | 0    | 0    | 0 |    |   |
| Farm 12            | 5                      | 5                         | 3    | 0 | 2  | 1  | 0                        | 0                         | 2                         | 1    | 0 | 0 | 1  | 0                        | 0                         | 5                         | 0    | - | - | -            | 0                        | 2                         | 5     | 0    | -    | -    | -    | 0 | 0  |   |
| Farm 13            | 5                      | 5                         | 5    | 0 | 0  | 5  | 0                        | 1                         | 0                         | -    | - | - | -  | -                        | 5                         | 0                         | -    | - | - | 0            | 0                        | 10                        | 5     | 3    | 2    | 0    | 0    | 4 |    |   |
| Farm 14            | 5                      | 5                         | 5    | 0 | 2  | 3  | 0                        | 2                         | 3                         | 3    | 1 | 2 | 0  | 0                        | 2                         | 5                         | 0    | - | - | -            | 0                        | 1                         | 0     | -    | -    | -    | -    | - |    |   |
| Farm 15            | 5                      | 4                         | 3    | 1 | 0  | 2  | 1                        | 0                         | 5                         | 5    | 3 | 0 | 2  | 1                        | 2                         | 5                         | 0    | - | - | -            | 1                        | 1                         | 5     | 3    | n.d. | n.d. | n.d. | 0 | 1  |   |
| Total no. of fish  | 78                     | 70                        | 60   | 9 | 19 | 32 | 7                        | 17                        | 34                        | 26   | 6 | 7 | 13 | 9                        | 10                        | 78                        | 3    | 1 | 2 | 0            | 7                        | 10                        | 48    | 17   | 12   | 2    | 0    | 9 | 19 |   |
| Total no. of farms | 15                     | 15                        | 15   |   |    |    |                          | 3                         | 8                         | 9    | 7 |   |    | 3                        | 6                         | 15                        | 1    |   |   |              | 3                        | 7                         | 8     | 4    |      |      |      | 3 | 5  |   |
