# Supplementary material for: Tenacibaculosis in Norwegian Atlantic salmon (Salmo salar) cage‐farmed in cold sea water is primarily associated with Tenacibaculum finnmarkense genomovar finnmarkense
Source: PubMed Central journal article supplement — J Fish Dis. 2022 Jan 9;45(4):523–34. doi: 10.1111/jfd.13577 (PMC9303539; doi:10.1111/jfd.13577), 2022-01-09

NVIB-2285/Farm-09  
 NVIB-3063/Farm-18\*  
 NVIB-2292/Farm-09  
 NVIB-2690/Farm-04  
 NVIB-2451/Farm-13  
 NVIB-3176/Farm-17\*  
 NVIB-2436/Farm-06  
 NVIB-3192/Farm-08\*  
 NVIB-2503/Farm-10  
 NVIB-2500/Farm-10  
 NVIB-2501/Farm-10  
 NVIB-2502/Farm-10  
 NVIB-2499/Farm-10  
 NVIB-3054/Farm-17\*  
 NVIB-2410/Farm-05  
 NVIB-2411/Farm-05  
 NVIB-2452/Farm-13  
 NVIB-2296/Farm-09  
 NVIB-3053/Farm-17\*  
 NVIB-2409/Farm-05  
 NVIB-2463/Farm-15  
 NVIB-2520/Farm-08  
 NVIB-2525/Farm-08  
 NVIB-2467/Farm-15  
 NVIB-2564/Farm-11  
 NVIB-2563/Farm-11  
 NVIB-2430/Farm-01  
 NVIB-2602/Farm-02  
 NVIB-2601/Farm-02  
 NVIB-2600/Farm-02  
 NVIB-2603/Farm-02  
 NVIB-2599/Farm-02  
 NVIB-2557/Farm-14  
 NVIB-3085/Farm-19\*  
 NVIB-2431/Farm-13  
 NVIB-3177/Farm-17\*  
 NVIB-3178/Farm-17\*  
 NVIB-3175/Farm-17\*  
 NVIB-2549/Farm-03  
 NVIB-2427/Farm-01  
 NVIB-2426/Farm-01  
 NVIB-2540/Farm-14  
 NVIB-2526/Farm-08  
 NVIB-3179/Farm-17\*  
 NVIB-2437/Farm-06  
 NVIB-3174/Farm-17\*  
 NVIB-3125/Farm-15\*  
 NVIB-2435/Farm-06  
 NVIB-2524/Farm-08  
 NVIB-3228/Farm-21\*  
 NVIB-3278/Farm-22\*  
 NVIB-2434/Farm-06  
 NVIB-3227/Farm-21\*  
 NVIB-3223/Farm-21\*  
 NVIB-3231/Farm-21\*  
 NVIB-3225/Farm-21\*  
 NVIB-2466/Farm-15

### County

- Troms og Finnmark
- Nordland
- Trøndelag
- Møre og Romsdal
- Vestland
- Reference

TNC006/GCA\_900239185  
 NVIB-2521/Farm-08  
 NVIB-2469/Farm-15  
 NVIB-2522/Farm-08  
 NVIB-2546/Farm-03  
 NVIB-2547/Farm-03  
 NVIB-2565/Farm-11  
 NVIB-2464/Farm-15  
 NVIB-2429/Farm-01  
 NVIB-2428/Farm-01  
 NVIB-2513/Farm-15  
 NVIB-3049/Farm-16\*  
 NVIB-2438/Farm-06  
 HFJ/GCA\_900239485  
 NVIB-2444/Farm-13  
 NVIB-2537/Farm-14  
 NVIB-2536/Farm-14  
 NVIB-2691/Farm-04  
 NVIB-2548/Farm-03  
 NVIB-3194/Farm-08\*  
 NVIB-3193/Farm-08\*  
 NVIB-2330/Farm-09  
 NVIB-2329/Farm-09

0.05

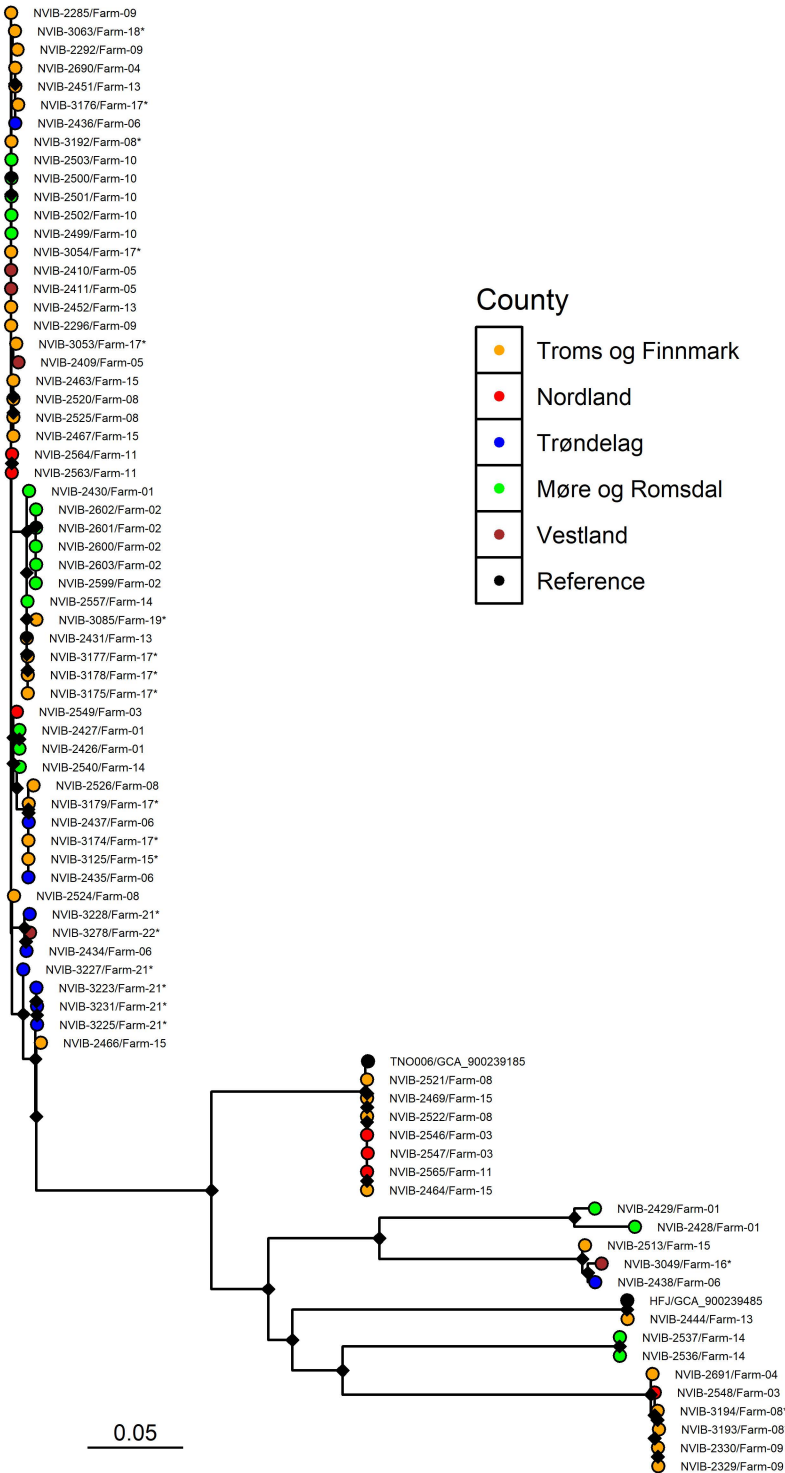

Supplement: JFD-45-523-s004.pdf [file JFD-45-523-s004.pdf]
