# Supplementary figures and images for: Tenacibaculosis in Norwegian Atlantic salmon (Salmo salar) cage‐farmed in cold sea water is primarily associated with Tenacibaculum finnmarkense genomovar finnmarkense
Source: PubMed Central journal article supplement — J Fish Dis. 2022 Jan 9;45(4):523–34. doi: 10.1111/jfd.13577 (PMC9303539; doi:10.1111/jfd.13577), 2022-01-09

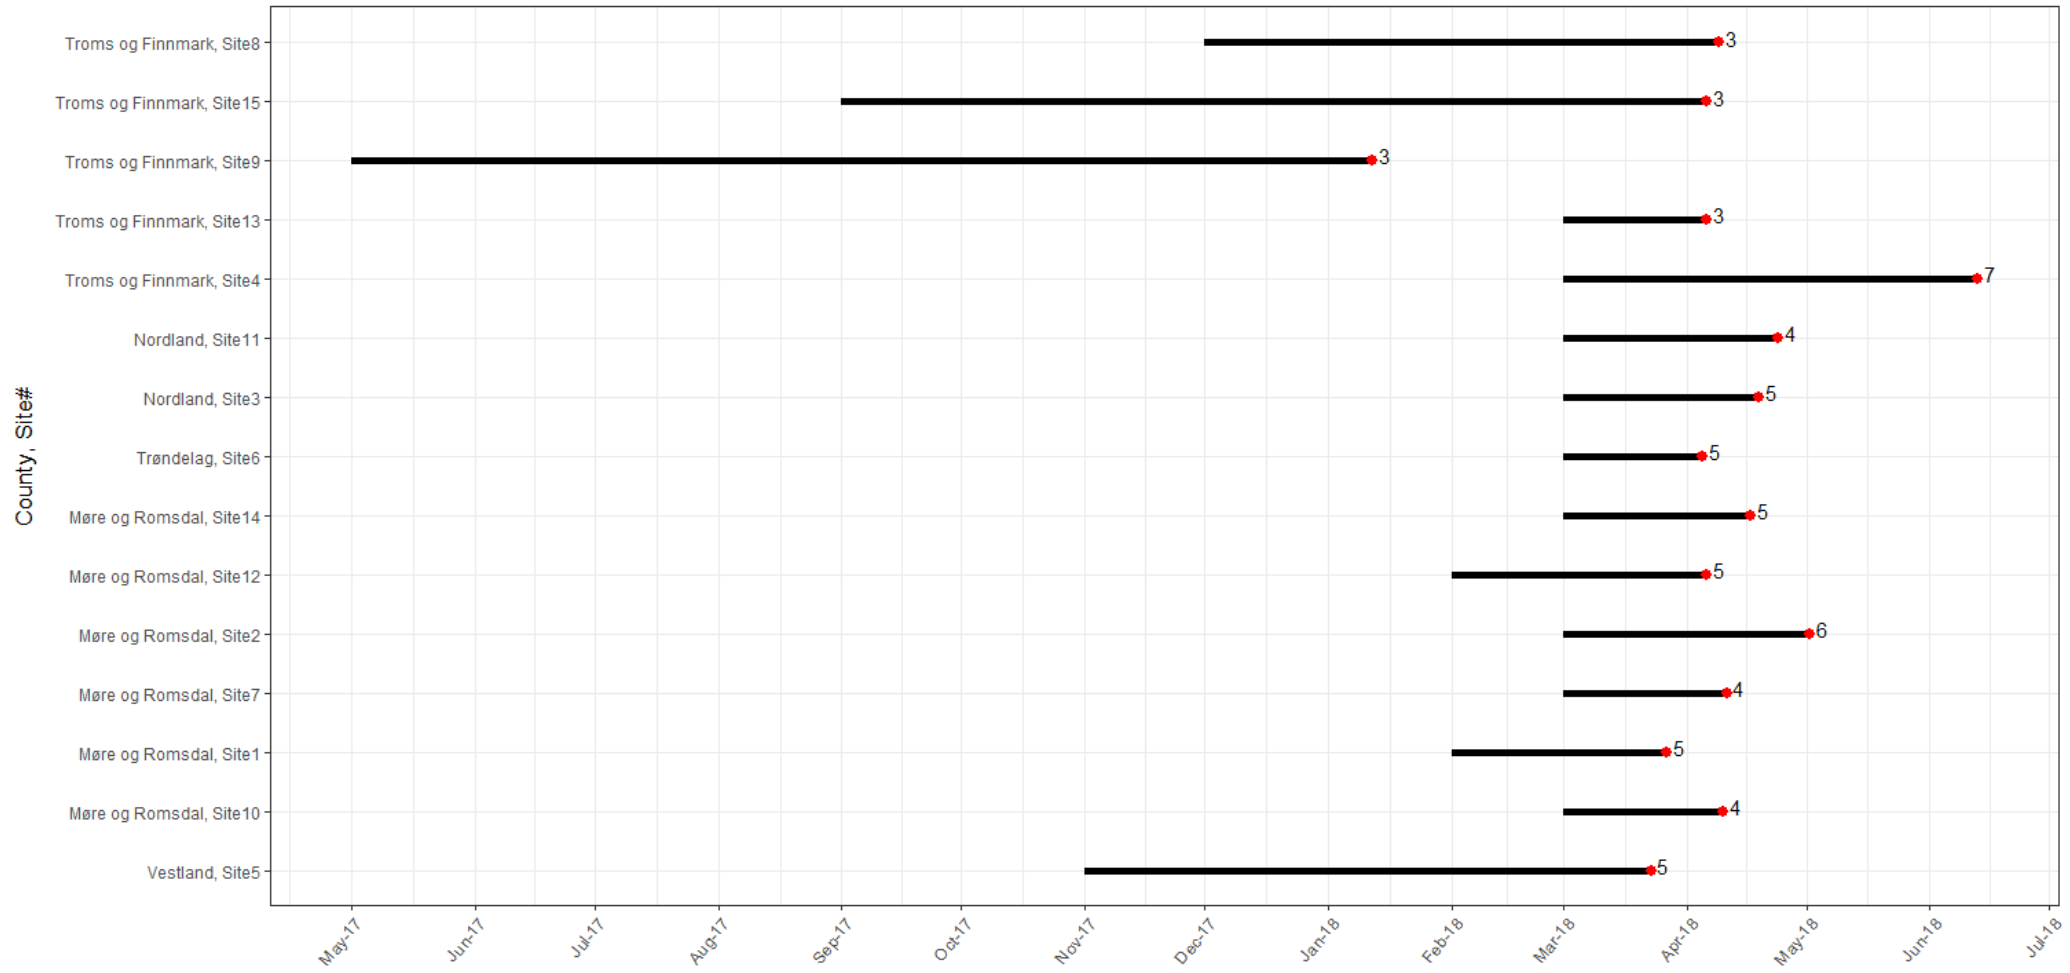

Supplement: JFD-45-523-s006.pdf [file JFD-45-523-s006.pdf]
